# Supplementary material for: Patient-perceived treatment burden of tuberculosis treatment
Source: PubMed Central journal article supplement (PMC7580887; doi:10.1371/journal.pone.0241124), 2020-10-22
Supplement: pone.0241124.s001.pdf [file pone.0241124.s001.pdf]

## Patient-Perceived Treatment Burden of Tuberculosis Treatment

Authors: Natasha C.H. Ting, Nicole El-Turk, Michael S. H. Chou, Claudia C. Dobler

### S1 File. Treatment Burden in Tuberculosis Interview Guide.

| Question Domain   | Main Question                                                                                                                                  | Prompts                                                                                                                                                                                                                                                                                  |
|-------------------|------------------------------------------------------------------------------------------------------------------------------------------------|------------------------------------------------------------------------------------------------------------------------------------------------------------------------------------------------------------------------------------------------------------------------------------------|
| Exploring burdens | 1. What do you know about tuberculosis? How do you know this?                                                                                  | <ul style="list-style-type: none"> <li>• Did you have to look up your condition or ask someone about it?</li> <li>• Did you have to Google ‘tuberculosis’?</li> <li>• Did you have to ask the doctors or nurses?</li> <li>• Did family and friends have to explain it to you?</li> </ul> |
|                   | 2. What kind of things do you have to do for treatment?                                                                                        | <ul style="list-style-type: none"> <li>• Take medications</li> <li>• Plan your day</li> </ul>                                                                                                                                                                                            |
|                   | 3. Thinking of everything you have to do for your tuberculosis treatment, is there anything that affects your ability to manage the condition? | <ul style="list-style-type: none"> <li>• Do you have school or work?</li> <li>• Do you have to care for someone else and that gets in the way?</li> </ul>                                                                                                                                |
|                   | 4. Are there times where you find it difficult to do everything you need to do to get treatment? ( <b>Link to healthcare burdens</b> )         |                                                                                                                                                                                                                                                                                          |
|                   | 5. Have you ever needed to cut back doing other things because of treatment?                                                                   | <ul style="list-style-type: none"> <li>• Have you ever needed to cut down on working?</li> <li>• Have you ever felt like you can’t do things you like anymore because of treatment?</li> </ul>                                                                                           |
|                   | 6. Do your treatments or self-care affect your social and family life? ( <b>Link to social burdens</b> )                                       | <ul style="list-style-type: none"> <li>• Do you feel like you don’t spend as much time with friends or family because of treatment?</li> </ul>                                                                                                                                           |

|                           |                                                                                                                                                           |                                                                                                                                                                                         |
|---------------------------|-----------------------------------------------------------------------------------------------------------------------------------------------------------|-----------------------------------------------------------------------------------------------------------------------------------------------------------------------------------------|
|                           | 7. Has your treatment for tuberculosis affected you financially in any way? <b>If yes</b> – how has it affected you? ( <b>Link to financial burdens</b> ) |                                                                                                                                                                                         |
| <b>Lifestyle changes</b>  | 1. Have you needed to change your lifestyle to accommodate for the treatment you are receiving? <b>If yes</b> – what sort of changes?                     | <ul style="list-style-type: none"> <li>• Have you ever needed to quit drinking alcohol, smoking, made diet changes etc.?</li> </ul>                                                     |
|                           | 2. Has your treatment restricted your ability to travel anywhere?                                                                                         | <ul style="list-style-type: none"> <li>• Have you ever been advised against travelling overseas?</li> <li>• Have you ever had to cancel overseas trips because of treatment?</li> </ul> |
| <b>Healthcare burdens</b> | 1. Have you struggled with keeping track of your appointments? <b>If yes</b> – is there a reason behind this?                                             | <ul style="list-style-type: none"> <li>• Have you ever forgotten about your appointments?</li> </ul>                                                                                    |
|                           | 2. Have you ever found it difficult to meet your scheduled appointment time? <b>If yes</b> – is there a reason behind this?                               | <ul style="list-style-type: none"> <li>• Have you ever had to change appointments last minute because of other things e.g. work?</li> </ul>                                             |
|                           | 3. Have you ever stopped your tuberculosis treatment before? <b>If yes</b> – could you tell me what made you stop and restart treatment again?            | <ul style="list-style-type: none"> <li>• Have you ever had issues with treatment that made you stop?</li> </ul>                                                                         |
|                           | 4. Do you have to organise any medical paperwork, and if so, how are you managing with it?                                                                | <ul style="list-style-type: none"> <li>• Do you ever have to obtain medical certificates?</li> </ul>                                                                                    |

|                                  |                                                                                                                                                                                                                     |                                                                                                                                                                                                                                      |
|----------------------------------|---------------------------------------------------------------------------------------------------------------------------------------------------------------------------------------------------------------------|--------------------------------------------------------------------------------------------------------------------------------------------------------------------------------------------------------------------------------------|
|                                  | <p>5. (If not previously raised) In terms of travel, how do you get to the clinic and how long does it take you</p>                                                                                                 |                                                                                                                                                                                                                                      |
|                                  | <p>6. What is the hardest part about the travel, if you have any difficulties? How significant is this difficulty?</p>                                                                                              | <ul style="list-style-type: none"> <li>• Do you find the travel time too long?</li> <li>• Is it stressful having to drive long distances?</li> </ul>                                                                                 |
|                                  | <p>7. How is your relationship with the nurses and doctors? Are you comfortable asking them questions regarding your condition or treatment? <b>If no</b> – what is stopping you if you are comfortable sharing</p> |                                                                                                                                                                                                                                      |
|                                  | <p>8. What do you think would make your tuberculosis treatment a lot easier for you?</p>                                                                                                                            | <ul style="list-style-type: none"> <li>• For example, providing parking for you</li> <li>• For example, sending a reminder text the day before appointments</li> </ul> <p>(Guide towards approaches that we can actually change)</p> |
| <p><b>Medication burdens</b></p> | <p>1. How often do you receive directly observed therapy and how much time do you have to spend each visit?</p>                                                                                                     | <ul style="list-style-type: none"> <li>• Do you think this amount of time is too long?</li> <li>• How much time is spent waiting for treatment or for an appointment?</li> </ul>                                                     |
|                                  | <p>2. Have you had any side-effects from the treatment that you needed additional treatment? <b>If yes</b> – what additional treatment has been required</p>                                                        |                                                                                                                                                                                                                                      |
|                                  | <p>3. Do you have any difficulties with taking the medications itself e.g. swallowing tablets</p>                                                                                                                   | <ul style="list-style-type: none"> <li>• What in particular is hard about taking the treatment e.g. taste, number of pills, pill size etc.</li> </ul>                                                                                |

|                              |                                                                                                                                                                                                                                                                        |                                                                                                                                                                                                                             |
|------------------------------|------------------------------------------------------------------------------------------------------------------------------------------------------------------------------------------------------------------------------------------------------------------------|-----------------------------------------------------------------------------------------------------------------------------------------------------------------------------------------------------------------------------|
|                              | <p>4. <b>For those on video directly observed treatment (VDOT)</b> – How are you managing your medications at home and organising your medication intake? Do you feel well-equipped and supported? <b>If no</b> – why and what could be done to make things easier</p> |                                                                                                                                                                                                                             |
|                              | <p>5. <b>For those on video directly observed treatment (VDOT)</b> – how difficult was it to install and learn how to use the app? Have you had issues with VDOT?</p>                                                                                                  | <ul style="list-style-type: none"> <li>• Have you had issues with connectivity?</li> <li>• Have you not been able to digitally connect with the nurse supervising?</li> </ul>                                               |
|                              | <p>6. <b>For those on video directly observed treatment (VDOT)</b> – would you recommend this video method to other patients? Why or why not?</p>                                                                                                                      |                                                                                                                                                                                                                             |
| <p><b>Social burdens</b></p> | <p>1. Have you ever felt isolated from those around you due to your condition? <b>If yes</b> – how has the isolation affected you and has it prevented you from continuing your treatment</p>                                                                          | <ul style="list-style-type: none"> <li>• Have you not had time to spend with family and friends because of appointments?</li> <li>• Have you felt worried about side effects and so avoid going out/socialising?</li> </ul> |
|                              | <p>2. Do you require someone else to help you with your tuberculosis care? <b>If yes</b> – who helps you, what do they do to help you?</p>                                                                                                                             |                                                                                                                                                                                                                             |
|                              | <p>3. Have you ever felt stigmatised (i.e. looked at or treated differently after your diagnosis)? <b>If yes</b> – can you give me an example of a time when you felt stigmatised</p>                                                                                  | <ul style="list-style-type: none"> <li>• Do people treat you differently when they know you are receiving treatment for tuberculosis?</li> </ul>                                                                            |
|                              | <p>4. How has your treatment affected your working/studying life?</p>                                                                                                                                                                                                  | <ul style="list-style-type: none"> <li>• Does it disrupt your study schedule?</li> <li>• Does it become hard to do the work you need to do?</li> <li>• Do you feel tired after taking the medications?</li> </ul>           |

|                                 |                                                                                                                                                                                                                               |                                                                                                                                                                                                              |
|---------------------------------|-------------------------------------------------------------------------------------------------------------------------------------------------------------------------------------------------------------------------------|--------------------------------------------------------------------------------------------------------------------------------------------------------------------------------------------------------------|
|                                 |                                                                                                                                                                                                                               | <ul style="list-style-type: none"> <li>• Do you feel like the treatment makes you tired and so this affects how well you work?</li> </ul>                                                                    |
|                                 | <p>4. (For those who are studying or employed) Do you think your treatment affects the way your colleagues or employer views you? <b>If yes</b> – do feel as if it has had a negative consequence? Give an example if so.</p> |                                                                                                                                                                                                              |
| <p><b>Financial burdens</b></p> | <p>1. Do you have to take time off work to visit the clinic? <b>If yes</b> – how long do you usually take off work and has it had any consequences on your career?</p>                                                        | <ul style="list-style-type: none"> <li>• Does treatment make you tired after and affect your work in this way?</li> </ul>                                                                                    |
|                                 | <p>2. What other things do you have to pay for in order to get treatment (acknowledge that the treatment itself is free)</p>                                                                                                  | <ul style="list-style-type: none"> <li>• Do you have to pay for transport?</li> <li>• Do you have to pay for parking?</li> <li>• How much would you have spent on treatment related costs so far?</li> </ul> |
|                                 | <p>3. Do you feel like your treatment is a burden financially?</p>                                                                                                                                                            | <ul style="list-style-type: none"> <li>• Do you find it expensive paying for public transport each time?</li> </ul>                                                                                          |
